# Supplementary material for: Flash Flood Susceptibility Mapping in Sinai, Egypt Using Hydromorphic Data, Principal Component Analysis and Logistic Regression
Source: MDPI journal article supplement (doi:10.3390/w14152434), 2022-08-06
Supplement: s1 [file s1]

Table S1. Values of the hydro-morphometric parameters for each basin.

| Basin No. | $A$<br>(km <sup>2</sup> ) | $P$<br>(km) | $L_b$<br>(km) | $F_f$ | $C_c$ | $R_e$ | $S_u$ | $N_u$ | $R_b$ | $L_u$<br>(km) | $D_d$<br>(km <sup>-1</sup> ) | $F_s$<br>(km <sup>-2</sup> ) | $L_o$<br>(km) | $R_t$<br>(km <sup>-1</sup> ) | $R_f$<br>(m) | $R_r$ | $R_n$ | $S$<br>(°) |
|-----------|---------------------------|-------------|---------------|-------|-------|-------|-------|-------|-------|---------------|------------------------------|------------------------------|---------------|------------------------------|--------------|-------|-------|------------|
| 1         | 364.2                     | 124.7       | 36.1          | 0.279 | 1.844 | 0.596 | 4     | 26    | 2.92  | 131.0         | 0.360                        | 0.071                        | 1.39          | 0.152                        | 2043         | 0.057 | 0.73  | 16.5       |
| 2         | 340.8                     | 135.0       | 44.4          | 0.173 | 2.063 | 0.469 | 4     | 29    | 2.74  | 161.6         | 0.474                        | 0.085                        | 1.05          | 0.141                        | 2537         | 0.057 | 1.20  | 17.6       |
| 3         | 1067.4                    | 302.5       | 72.3          | 0.204 | 2.612 | 0.510 | 4     | 84    | 4.69  | 440.7         | 0.413                        | 0.079                        | 1.21          | 0.215                        | 1620         | 0.022 | 0.67  | 10.6       |
| 4         | 715.7                     | 203.9       | 59.1          | 0.205 | 2.150 | 0.511 | 4     | 70    | 3.79  | 295.6         | 0.413                        | 0.098                        | 1.21          | 0.255                        | 1401         | 0.024 | 0.58  | 9.3        |
| 5         | 356.7                     | 124.9       | 37.8          | 0.250 | 1.866 | 0.564 | 4     | 35    | 2.92  | 138.4         | 0.388                        | 0.098                        | 1.29          | 0.192                        | 1121         | 0.030 | 0.43  | 7.8        |
| 6         | 106.8                     | 71.2        | 21.9          | 0.223 | 1.945 | 0.533 | 3     | 11    | 3.00  | 42.1          | 0.394                        | 0.103                        | 1.27          | 0.112                        | 866          | 0.040 | 0.34  | 8.1        |
| 7         | 117.1                     | 77.2        | 21.6          | 0.251 | 2.012 | 0.566 | 3     | 13    | 3.50  | 43.3          | 0.370                        | 0.111                        | 1.35          | 0.130                        | 778          | 0.036 | 0.29  | 7.9        |
| 8         | 77.8                      | 57.9        | 16.5          | 0.286 | 1.852 | 0.604 | 3     | 11    | 2.67  | 42.5          | 0.546                        | 0.141                        | 0.92          | 0.121                        | 423          | 0.026 | 0.23  | 3.8        |
| 9         | 424.1                     | 133.0       | 39.5          | 0.272 | 1.822 | 0.589 | 4     | 41    | 3.31  | 174.5         | 0.411                        | 0.097                        | 1.22          | 0.233                        | 931          | 0.024 | 0.38  | 6.6        |
| 10        | 485.8                     | 155.4       | 41.1          | 0.288 | 1.989 | 0.605 | 4     | 45    | 3.42  | 196.0         | 0.403                        | 0.093                        | 1.24          | 0.219                        | 897          | 0.022 | 0.36  | 7.2        |
| 11        | 290.2                     | 144.5       | 45.6          | 0.139 | 2.393 | 0.422 | 5     | 22    | 2.50  | 127.3         | 0.439                        | 0.076                        | 1.14          | 0.097                        | 908          | 0.020 | 0.40  | 7.3        |
| 12        | 576.9                     | 182.2       | 56.4          | 0.181 | 2.139 | 0.481 | 4     | 49    | 3.58  | 263.6         | 0.457                        | 0.085                        | 1.09          | 0.209                        | 864          | 0.015 | 0.39  | 6.5        |
| 13        | 108.4                     | 73.3        | 25.9          | 0.162 | 1.985 | 0.454 | 3     | 11    | 3.00  | 64.6          | 0.596                        | 0.101                        | 0.84          | 0.109                        | 630          | 0.024 | 0.38  | 3.2        |
| 14        | 213.3                     | 96.1        | 32.7          | 0.200 | 1.857 | 0.505 | 3     | 23    | 4.33  | 126.5         | 0.593                        | 0.108                        | 0.84          | 0.166                        | 745          | 0.023 | 0.44  | 8.9        |
| 15        | 78.4                      | 53.8        | 18.0          | 0.243 | 1.713 | 0.557 | 3     | 8     | 2.25  | 46.2          | 0.589                        | 0.102                        | 0.85          | 0.093                        | 242          | 0.013 | 0.14  | 3.0        |
| 16        | 193.8                     | 100.7       | 31.2          | 0.199 | 2.041 | 0.503 | 3     | 13    | 3.00  | 110.8         | 0.572                        | 0.067                        | 0.87          | 0.089                        | 708          | 0.023 | 0.40  | 5.4        |
| 17        | 443.7                     | 180.1       | 52.1          | 0.164 | 2.412 | 0.456 | 5     | 37    | 2.53  | 220.7         | 0.497                        | 0.083                        | 1.01          | 0.139                        | 804          | 0.015 | 0.40  | 7.8        |
| 18        | 329.3                     | 110.1       | 33.3          | 0.296 | 1.712 | 0.614 | 4     | 35    | 2.92  | 182.3         | 0.554                        | 0.106                        | 0.90          | 0.218                        | 583          | 0.017 | 0.32  | 2.5        |
| 19        | 461.5                     | 210.8       | 63.7          | 0.114 | 2.768 | 0.381 | 4     | 38    | 3.28  | 206.2         | 0.447                        | 0.082                        | 1.12          | 0.138                        | 827          | 0.013 | 0.37  | 5.3        |
| 20        | 698.2                     | 196.7       | 56.3          | 0.220 | 2.100 | 0.530 | 4     | 52    | 3.38  | 357.0         | 0.511                        | 0.074                        | 0.98          | 0.193                        | 731          | 0.013 | 0.37  | 4.2        |
| 21        | 247.9                     | 130.3       | 32.4          | 0.236 | 2.335 | 0.549 | 3     | 23    | 4.67  | 133.9         | 0.540                        | 0.093                        | 0.93          | 0.146                        | 460          | 0.014 | 0.25  | 4.8        |
| 22        | 524.0                     | 219.0       | 58.3          | 0.154 | 2.699 | 0.443 | 4     | 46    | 3.43  | 259.6         | 0.495                        | 0.088                        | 1.01          | 0.155                        | 631          | 0.011 | 0.31  | 5.4        |
| 23        | 625.5                     | 216.6       | 55.8          | 0.201 | 2.444 | 0.506 | 4     | 54    | 3.79  | 317.4         | 0.507                        | 0.086                        | 0.99          | 0.198                        | 438          | 0.008 | 0.22  | 4.8        |
| 24        | 763.7                     | 258.5       | 67.0          | 0.170 | 2.638 | 0.466 | 4     | 62    | 4.01  | 362.0         | 0.474                        | 0.081                        | 1.05          | 0.178                        | 583          | 0.009 | 0.28  | 4.5        |
| 25        | 747.2                     | 259.0       | 73.6          | 0.138 | 2.673 | 0.419 | 4     | 64    | 4.03  | 362.4         | 0.485                        | 0.086                        | 1.03          | 0.197                        | 600          | 0.008 | 0.29  | 4.9        |
| 26        | 919.9                     | 265.7       | 68.9          | 0.194 | 2.471 | 0.497 | 4     | 65    | 3.67  | 472.5         | 0.514                        | 0.071                        | 0.97          | 0.177                        | 681          | 0.010 | 0.35  | 3.9        |
| 27        | 1365.0                    | 303.3       | 67.4          | 0.301 | 2.316 | 0.619 | 4     | 96    | 4.37  | 667.2         | 0.489                        | 0.070                        | 1.02          | 0.244                        | 632          | 0.009 | 0.31  | 3.9        |

|    |        |       |      |       |       |       |   |     |      |        |       |       |      |       |      |       |      |      |
|----|--------|-------|------|-------|-------|-------|---|-----|------|--------|-------|-------|------|-------|------|-------|------|------|
| 28 | 521.7  | 202.8 | 53.7 | 0.181 | 2.504 | 0.480 | 4 | 36  | 3.89 | 223.4  | 0.428 | 0.069 | 1.17 | 0.138 | 560  | 0.010 | 0.24 | 2.6  |
| 29 | 562.2  | 206.9 | 46.6 | 0.259 | 2.462 | 0.575 | 5 | 35  | 2.48 | 278.6  | 0.495 | 0.062 | 1.01 | 0.116 | 360  | 0.008 | 0.18 | 2.3  |
| 30 | 1399.0 | 198.7 | 52.9 | 0.500 | 1.499 | 0.798 | 5 | 128 | 5.80 | 713.9  | 0.510 | 0.091 | 0.98 | 0.589 | 961  | 0.018 | 0.49 | 3.5  |
| 31 | 1387.7 | 263.0 | 69.1 | 0.291 | 1.992 | 0.609 | 5 | 130 | 3.79 | 750.4  | 0.541 | 0.094 | 0.92 | 0.392 | 993  | 0.014 | 0.54 | 5.5  |
| 32 | 442.9  | 134.0 | 38.3 | 0.302 | 1.796 | 0.621 | 5 | 44  | 2.58 | 246.3  | 0.556 | 0.099 | 0.90 | 0.224 | 827  | 0.022 | 0.46 | 4.6  |
| 33 | 450.2  | 200.4 | 43.0 | 0.244 | 2.664 | 0.557 | 6 | 42  | 3.39 | 238.0  | 0.529 | 0.093 | 0.95 | 0.160 | 821  | 0.019 | 0.43 | 3.6  |
| 34 | 998.3  | 198.1 | 45.3 | 0.485 | 1.769 | 0.786 | 6 | 77  | 3.22 | 467.9  | 0.469 | 0.077 | 1.07 | 0.298 | 807  | 0.018 | 0.38 | 3.9  |
| 35 | 681.8  | 166.9 | 48.5 | 0.290 | 1.803 | 0.608 | 6 | 72  | 3.12 | 325.4  | 0.477 | 0.106 | 1.05 | 0.324 | 707  | 0.015 | 0.34 | 4.5  |
| 36 | 997.4  | 237.6 | 60.2 | 0.275 | 2.122 | 0.592 | 6 | 97  | 3.42 | 462.8  | 0.464 | 0.097 | 1.08 | 0.307 | 718  | 0.012 | 0.33 | 3.9  |
| 37 | 1854.7 | 276.5 | 69.5 | 0.384 | 1.811 | 0.700 | 5 | 171 | 3.55 | 851.2  | 0.459 | 0.092 | 1.09 | 0.477 | 606  | 0.009 | 0.28 | 2.8  |
| 38 | 378.1  | 155.1 | 44.4 | 0.192 | 2.251 | 0.495 | 5 | 37  | 2.58 | 192.5  | 0.509 | 0.098 | 0.98 | 0.168 | 636  | 0.014 | 0.32 | 3.2  |
| 39 | 413.2  | 142.8 | 38.4 | 0.280 | 1.982 | 0.597 | 3 | 33  | 5.17 | 181.4  | 0.439 | 0.080 | 1.14 | 0.182 | 259  | 0.007 | 0.11 | 1.7  |
| 40 | 124.0  | 72.5  | 19.2 | 0.336 | 1.838 | 0.655 | 4 | 16  | 2.56 | 55.0   | 0.444 | 0.129 | 1.13 | 0.152 | 254  | 0.013 | 0.11 | 1.8  |
| 41 | 307.8  | 124.2 | 34.8 | 0.254 | 1.996 | 0.569 | 6 | 27  | 2.75 | 144.8  | 0.470 | 0.088 | 1.06 | 0.161 | 230  | 0.007 | 0.11 | 1.5  |
| 42 | 1402.9 | 224.7 | 57.0 | 0.431 | 1.692 | 0.741 | 5 | 123 | 3.75 | 680.3  | 0.485 | 0.088 | 1.03 | 0.405 | 770  | 0.014 | 0.37 | 1.9  |
| 43 | 368.5  | 165.5 | 32.3 | 0.354 | 2.431 | 0.672 | 5 | 37  | 2.54 | 195.0  | 0.529 | 0.100 | 0.95 | 0.145 | 424  | 0.013 | 0.22 | 2.3  |
| 44 | 1405.2 | 251.6 | 59.7 | 0.395 | 1.893 | 0.709 | 5 | 129 | 3.26 | 745.4  | 0.530 | 0.092 | 0.94 | 0.386 | 587  | 0.010 | 0.31 | 3.0  |
| 45 | 1225.1 | 273.0 | 82.1 | 0.182 | 2.201 | 0.481 | 5 | 92  | 3.34 | 570.3  | 0.466 | 0.075 | 1.07 | 0.256 | 942  | 0.011 | 0.44 | 4.0  |
| 46 | 1128.4 | 188.1 | 51.8 | 0.421 | 1.580 | 0.732 | 5 | 103 | 3.01 | 495.0  | 0.439 | 0.091 | 1.14 | 0.393 | 671  | 0.013 | 0.29 | 3.7  |
| 47 | 2254.1 | 312.0 | 94.5 | 0.252 | 1.854 | 0.567 | 5 | 171 | 3.61 | 1121.9 | 0.498 | 0.076 | 1.00 | 0.429 | 1198 | 0.013 | 0.60 | 5.3  |
| 48 | 2170.3 | 385.8 | 80.3 | 0.337 | 2.336 | 0.655 | 5 | 176 | 3.58 | 1016.8 | 0.469 | 0.081 | 1.07 | 0.353 | 877  | 0.011 | 0.41 | 3.0  |
| 49 | 281.9  | 103.8 | 30.8 | 0.297 | 1.744 | 0.615 | 5 | 29  | 2.88 | 123.2  | 0.437 | 0.103 | 1.14 | 0.193 | 186  | 0.006 | 0.08 | 1.9  |
| 50 | 1536.6 | 221.0 | 56.3 | 0.484 | 1.590 | 0.786 | 5 | 126 | 3.30 | 733.9  | 0.478 | 0.082 | 1.05 | 0.439 | 536  | 0.010 | 0.26 | 2.9  |
| 51 | 113.1  | 72.5  | 22.6 | 0.221 | 1.922 | 0.531 | 4 | 10  | 2.00 | 56.4   | 0.499 | 0.088 | 1.00 | 0.083 | 246  | 0.011 | 0.12 | 1.9  |
| 52 | 215.4  | 85.5  | 23.8 | 0.379 | 1.644 | 0.695 | 3 | 17  | 3.50 | 80.0   | 0.371 | 0.079 | 1.35 | 0.140 | 210  | 0.009 | 0.08 | 2.3  |
| 53 | 866.6  | 210.0 | 55.1 | 0.286 | 2.013 | 0.603 | 4 | 61  | 3.68 | 360.9  | 0.416 | 0.070 | 1.20 | 0.224 | 701  | 0.013 | 0.29 | 6.0  |
| 54 | 2173.1 | 286.9 | 85.1 | 0.300 | 1.736 | 0.618 | 5 | 159 | 3.54 | 818.5  | 0.377 | 0.073 | 1.33 | 0.436 | 1223 | 0.014 | 0.46 | 10.6 |
| 55 | 478.3  | 139.1 | 38.0 | 0.331 | 1.794 | 0.649 | 4 | 39  | 3.17 | 191.2  | 0.400 | 0.082 | 1.25 | 0.201 | 1222 | 0.032 | 0.49 | 15.3 |
| 56 | 1596.3 | 239.8 | 65.2 | 0.375 | 1.693 | 0.691 | 5 | 132 | 3.37 | 614.1  | 0.385 | 0.083 | 1.30 | 0.409 | 2221 | 0.034 | 0.85 | 14.1 |
| 57 | 475.0  | 203.3 | 48.6 | 0.202 | 2.631 | 0.507 | 4 | 37  | 3.22 | 187.3  | 0.394 | 0.078 | 1.27 | 0.138 | 1582 | 0.033 | 0.62 | 16.2 |

|    |        |       |      |       |       |       |   |     |      |       |       |       |      |       |      |       |      |      |
|----|--------|-------|------|-------|-------|-------|---|-----|------|-------|-------|-------|------|-------|------|-------|------|------|
| 58 | 657.9  | 150.6 | 37.6 | 0.467 | 1.656 | 0.771 | 4 | 47  | 4.10 | 225.3 | 0.342 | 0.071 | 1.46 | 0.259 | 1858 | 0.049 | 0.64 | 14.0 |
| 59 | 1160.4 | 209.5 | 67.3 | 0.256 | 1.735 | 0.571 | 4 | 87  | 4.20 | 530.1 | 0.457 | 0.075 | 1.09 | 0.329 | 1072 | 0.016 | 0.49 | 5.4  |
| 60 | 1070.4 | 211.6 | 49.1 | 0.444 | 1.825 | 0.752 | 6 | 88  | 3.32 | 461.5 | 0.431 | 0.082 | 1.16 | 0.307 | 456  | 0.009 | 0.20 | 2.1  |
| 61 | 350.8  | 162.6 | 42.5 | 0.195 | 2.449 | 0.498 | 6 | 27  | 4.83 | 164.7 | 0.469 | 0.077 | 1.07 | 0.141 | 233  | 0.005 | 0.11 | 3.0  |
| 62 | 607.4  | 190.0 | 51.0 | 0.234 | 2.175 | 0.545 | 5 | 55  | 2.65 | 337.6 | 0.556 | 0.091 | 0.90 | 0.195 | 187  | 0.004 | 0.10 | 2.3  |
| 63 | 89.1   | 91.5  | 22.2 | 0.181 | 2.734 | 0.480 | 3 | 9   | 2.50 | 41.9  | 0.470 | 0.101 | 1.06 | 0.066 | 237  | 0.011 | 0.11 | 2.6  |
| 64 | 130.8  | 99.2  | 23.0 | 0.247 | 2.448 | 0.561 | 3 | 13  | 3.50 | 63.1  | 0.482 | 0.099 | 1.04 | 0.101 | 216  | 0.009 | 0.10 | 2.5  |
| 65 | 574.7  | 145.6 | 33.3 | 0.517 | 1.713 | 0.812 | 4 | 48  | 3.30 | 303.0 | 0.527 | 0.084 | 0.95 | 0.240 | 540  | 0.016 | 0.28 | 3.2  |
| 66 | 105.9  | 61.0  | 20.1 | 0.263 | 1.674 | 0.578 | 3 | 12  | 3.25 | 44.8  | 0.423 | 0.113 | 1.18 | 0.147 | 1378 | 0.069 | 0.58 | 14.5 |
| 67 | 72.5   | 58.4  | 20.1 | 0.179 | 1.936 | 0.478 | 3 | 9   | 2.50 | 44.3  | 0.610 | 0.124 | 0.82 | 0.103 | 1103 | 0.055 | 0.67 | 8.7  |
| 68 | 48.3   | 53.8  | 21.7 | 0.103 | 2.185 | 0.362 | 3 | 7   | 2.00 | 41.4  | 0.857 | 0.145 | 0.58 | 0.074 | 1526 | 0.070 | 1.31 | 7.3  |
| 69 | 143.1  | 89.1  | 23.0 | 0.272 | 2.101 | 0.588 | 3 | 16  | 3.50 | 61.4  | 0.429 | 0.112 | 1.16 | 0.135 | 100  | 0.004 | 0.04 | 2.6  |
| 70 | 1183.2 | 250.0 | 61.5 | 0.313 | 2.050 | 0.632 | 4 | 105 | 4.32 | 591.4 | 0.500 | 0.089 | 1.00 | 0.312 | 629  | 0.010 | 0.31 | 4.1  |
| 71 | 54.1   | 65.8  | 23.1 | 0.101 | 2.523 | 0.359 | 2 | 5   | 4.00 | 32.5  | 0.601 | 0.092 | 0.83 | 0.061 | 327  | 0.014 | 0.20 | 1.9  |
| 72 | 27.8   | 35.4  | 13.3 | 0.157 | 1.896 | 0.448 | 2 | 4   | 3.00 | 12.3  | 0.440 | 0.144 | 1.14 | 0.085 | 167  | 0.013 | 0.07 | 1.8  |
| 73 | 58.4   | 71.3  | 24.5 | 0.097 | 2.633 | 0.352 | 2 | 6   | 5.00 | 29.0  | 0.496 | 0.103 | 1.01 | 0.070 | 511  | 0.021 | 0.25 | 2.3  |
| 74 | 56.7   | 72.4  | 18.2 | 0.171 | 2.710 | 0.466 | 2 | 5   | 4.00 | 27.0  | 0.476 | 0.088 | 1.05 | 0.055 | 235  | 0.013 | 0.11 | 2.7  |
| 75 | 50.8   | 50.3  | 12.8 | 0.309 | 1.990 | 0.627 | 2 | 4   | 3.00 | 24.5  | 0.483 | 0.079 | 1.03 | 0.060 | 109  | 0.008 | 0.05 | 2.5  |
| 76 | 124.6  | 79.9  | 26.2 | 0.181 | 2.019 | 0.481 | 2 | 5   | 4.00 | 56.6  | 0.454 | 0.040 | 1.10 | 0.050 | 206  | 0.008 | 0.09 | 2.2  |
| 77 | 83.2   | 56.4  | 15.3 | 0.354 | 1.743 | 0.672 | 2 | 5   | 4.00 | 31.8  | 0.382 | 0.060 | 1.31 | 0.071 | 814  | 0.053 | 0.31 | 10.4 |
| 78 | 84.8   | 62.6  | 19.7 | 0.219 | 1.917 | 0.529 | 3 | 9   | 4.00 | 41.2  | 0.486 | 0.106 | 1.03 | 0.112 | 806  | 0.041 | 0.39 | 6.3  |
| 79 | 122.4  | 72.9  | 23.4 | 0.224 | 1.859 | 0.534 | 3 | 12  | 2.83 | 68.4  | 0.559 | 0.098 | 0.90 | 0.110 | 1363 | 0.058 | 0.76 | 10.8 |
| 80 | 71.5   | 57.6  | 19.6 | 0.187 | 1.922 | 0.488 | 3 | 6   | 1.75 | 43.1  | 0.603 | 0.084 | 0.83 | 0.052 | 727  | 0.037 | 0.44 | 3.9  |
| 81 | 178.7  | 112.7 | 37.9 | 0.124 | 2.379 | 0.398 | 3 | 16  | 3.50 | 83.5  | 0.467 | 0.090 | 1.07 | 0.106 | 2347 | 0.062 | 1.10 | 16.8 |
| 82 | 179.2  | 104.4 | 36.2 | 0.137 | 2.201 | 0.418 | 3 | 18  | 3.83 | 95.6  | 0.534 | 0.100 | 0.94 | 0.134 | 2415 | 0.067 | 1.29 | 13.4 |
| 83 | 79.2   | 64.2  | 22.8 | 0.153 | 2.035 | 0.441 | 3 | 9   | 2.50 | 66.3  | 0.838 | 0.114 | 0.60 | 0.093 | 669  | 0.029 | 0.56 | 2.8  |
| 84 | 1895.6 | 232.8 | 64.2 | 0.460 | 1.508 | 0.765 | 4 | 194 | 5.77 | 887.6 | 0.468 | 0.102 | 1.07 | 0.653 | 2595 | 0.040 | 1.22 | 12.4 |
| 85 | 125.9  | 70.5  | 22.6 | 0.247 | 1.771 | 0.561 | 3 | 13  | 3.50 | 39.3  | 0.312 | 0.103 | 1.60 | 0.142 | 658  | 0.029 | 0.21 | 7.1  |
| 86 | 1139.0 | 321.5 | 80.5 | 0.176 | 2.687 | 0.473 | 4 | 86  | 4.63 | 438.9 | 0.385 | 0.076 | 1.30 | 0.218 | 2055 | 0.026 | 0.79 | 12.1 |
| 87 | 67.1   | 52.5  | 14.9 | 0.303 | 1.807 | 0.621 | 3 | 9   | 2.50 | 26.5  | 0.394 | 0.134 | 1.27 | 0.114 | 665  | 0.045 | 0.26 | 9.6  |

|     |        |       |      |       |       |       |   |    |      |       |       |       |      |       |      |       |      |      |
|-----|--------|-------|------|-------|-------|-------|---|----|------|-------|-------|-------|------|-------|------|-------|------|------|
| 88  | 121.2  | 68.2  | 19.6 | 0.316 | 1.747 | 0.634 | 3 | 11 | 3.00 | 49.9  | 0.412 | 0.091 | 1.21 | 0.117 | 654  | 0.033 | 0.27 | 8.3  |
| 89  | 876.9  | 210.5 | 53.2 | 0.310 | 2.005 | 0.628 | 4 | 78 | 3.98 | 349.3 | 0.398 | 0.089 | 1.26 | 0.285 | 1186 | 0.022 | 0.47 | 9.5  |
| 90  | 111.4  | 80.6  | 25.5 | 0.171 | 2.154 | 0.466 | 3 | 13 | 5.10 | 63.5  | 0.570 | 0.117 | 0.88 | 0.025 | 441  | 0.017 | 0.25 | 2.9  |
| 91  | 54.6   | 45.1  | 14.3 | 0.267 | 1.722 | 0.583 | 3 | 8  | 2.25 | 36.0  | 0.660 | 0.146 | 0.76 | 0.111 | 134  | 0.009 | 0.09 | 1.7  |
| 92  | 119.8  | 80.5  | 24.2 | 0.204 | 2.074 | 0.510 | 3 | 11 | 3.00 | 52.0  | 0.434 | 0.092 | 1.15 | 0.099 | 125  | 0.005 | 0.05 | 3.1  |
| 93  | 104.9  | 74.4  | 17.2 | 0.354 | 2.049 | 0.672 | 3 | 11 | 2.67 | 44.4  | 0.424 | 0.105 | 1.18 | 0.094 | 67   | 0.004 | 0.03 | 1.9  |
| 94  | 65.2   | 56.9  | 14.1 | 0.330 | 1.986 | 0.648 | 3 | 7  | 2.00 | 26.2  | 0.402 | 0.107 | 1.24 | 0.070 | 65   | 0.005 | 0.03 | 2.5  |
| 95  | 62.9   | 51.0  | 13.2 | 0.360 | 1.815 | 0.677 | 3 | 8  | 2.25 | 24.5  | 0.390 | 0.127 | 1.28 | 0.098 | 960  | 0.073 | 0.37 | 17.8 |
| 96  | 69.1   | 45.8  | 13.7 | 0.366 | 1.554 | 0.683 | 3 | 8  | 2.25 | 26.8  | 0.387 | 0.116 | 1.29 | 0.109 | 933  | 0.068 | 0.36 | 19.0 |
| 97  | 97.2   | 55.6  | 15.2 | 0.423 | 1.591 | 0.734 | 3 | 8  | 2.25 | 37.3  | 0.383 | 0.082 | 1.30 | 0.090 | 1238 | 0.082 | 0.47 | 18.7 |
| 98  | 1042.6 | 208.1 | 48.2 | 0.450 | 1.818 | 0.757 | 4 | 82 | 3.98 | 405.1 | 0.389 | 0.079 | 1.29 | 0.288 | 2415 | 0.050 | 0.94 | 21.4 |
| 99  | 85.3   | 56.2  | 14.1 | 0.430 | 1.716 | 0.740 | 2 | 10 | 4.00 | 38.4  | 0.450 | 0.117 | 1.11 | 0.142 | 972  | 0.069 | 0.44 | 13.7 |
| 100 | 84.2   | 72.1  | 27.0 | 0.115 | 2.215 | 0.383 | 2 | 7  | 6.00 | 65.5  | 0.777 | 0.083 | 0.64 | 0.083 | 1551 | 0.057 | 1.21 | 6.6  |
| 101 | 41.2   | 63.8  | 24.3 | 0.070 | 2.803 | 0.299 | 2 | 4  | 3.00 | 29.0  | 0.704 | 0.097 | 0.71 | 0.047 | 1382 | 0.057 | 0.97 | 5.1  |
| 102 | 66.0   | 58.1  | 22.0 | 0.136 | 2.018 | 0.416 | 2 | 7  | 6.00 | 36.3  | 0.550 | 0.106 | 0.91 | 0.103 | 763  | 0.035 | 0.42 | 4.5  |
| 103 | 255.8  | 139.8 | 34.7 | 0.213 | 2.465 | 0.521 | 4 | 26 | 2.92 | 115.0 | 0.450 | 0.102 | 1.11 | 0.136 | 130  | 0.004 | 0.06 | 1.9  |
| 104 | 42.4   | 41.6  | 14.9 | 0.191 | 1.800 | 0.493 | 2 | 3  | 2.00 | 17.7  | 0.417 | 0.071 | 1.20 | 0.048 | 528  | 0.035 | 0.22 | 5.2  |
| 105 | 74.9   | 66.2  | 24.3 | 0.126 | 2.159 | 0.401 | 2 | 6  | 5.00 | 50.1  | 0.669 | 0.080 | 0.75 | 0.075 | 1337 | 0.055 | 0.89 | 9.2  |
| 106 | 51.7   | 55.0  | 21.1 | 0.116 | 2.155 | 0.385 | 2 | 4  | 3.00 | 34.4  | 0.665 | 0.077 | 0.75 | 0.055 | 1482 | 0.070 | 0.98 | 8.6  |
| 107 | 47.5   | 42.6  | 14.9 | 0.214 | 1.743 | 0.522 | 2 | 4  | 3.00 | 21.5  | 0.452 | 0.084 | 1.11 | 0.070 | 703  | 0.047 | 0.32 | 5.2  |
| 108 | 38.9   | 56.1  | 21.4 | 0.085 | 2.537 | 0.329 | 2 | 3  | 2.00 | 26.6  | 0.684 | 0.077 | 0.73 | 0.036 | 418  | 0.020 | 0.29 | 2.4  |
| 109 | 19.2   | 31.0  | 10.9 | 0.160 | 1.994 | 0.452 | 2 | 3  | 2.00 | 11.0  | 0.574 | 0.156 | 0.87 | 0.065 | 146  | 0.013 | 0.08 | 2.3  |
| 110 | 70.5   | 85.9  | 20.0 | 0.176 | 2.884 | 0.473 | 2 | 6  | 5.00 | 32.2  | 0.456 | 0.085 | 1.10 | 0.058 | 86   | 0.004 | 0.04 | 2.4  |
| 111 | 42.1   | 48.0  | 12.3 | 0.278 | 2.086 | 0.595 | 2 | 4  | 3.00 | 13.9  | 0.330 | 0.095 | 1.51 | 0.063 | 137  | 0.011 | 0.05 | 4.0  |
| 112 | 25.0   | 44.1  | 11.9 | 0.177 | 2.488 | 0.474 | 2 | 3  | 2.00 | 16.1  | 0.643 | 0.120 | 0.78 | 0.045 | 198  | 0.017 | 0.13 | 3.3  |

Table S2. PCA scores after Varimax rotation.

| Parameter | Principal component |        |        |        |        |
|-----------|---------------------|--------|--------|--------|--------|
|           | $PC_1$              | $PC_2$ | $PC_3$ | $PC_4$ | $PC_5$ |
| $A$       | 0.14                | 0.00   | 0.03   | 0.04   | 0.02   |
| $P$       | 0.17                | 0.00   | -0.13  | -0.06  | -0.06  |
| $L_b$     | 0.18                | 0.02   | -0.15  | -0.04  | -0.06  |
| $F_f$     | -0.02               | -0.03  | 0.31   | 0.00   | 0.05   |
| $C_c$     | 0.06                | -0.03  | -0.35  | -0.10  | -0.03  |
| $R_e$     | -0.01               | -0.04  | 0.30   | -0.02  | 0.03   |
| $S_u$     | 0.19                | -0.01  | -0.06  | -0.02  | -0.40  |
| $N_u$     | 0.14                | 0.00   | 0.06   | 0.07   | 0.03   |
| $R_b$     | -0.10               | -0.04  | 0.07   | 0.02   | 0.86   |
| $L_u$     | 0.15                | -0.01  | 0.04   | 0.08   | 0.03   |
| $D_d$     | 0.03                | 0.01   | 0.04   | 0.43   | 0.01   |
| $F_s$     | -0.03               | 0.01   | 0.16   | 0.21   | -0.21  |
| $L_o$     | -0.04               | 0.02   | -0.03  | -0.43  | -0.02  |
| $R_t$     | 0.10                | 0.01   | 0.15   | 0.09   | 0.08   |
| $R_f$     | 0.04                | 0.28   | -0.05  | -0.02  | -0.02  |
| $R_r$     | -0.07               | 0.26   | 0.06   | 0.03   | -0.02  |
| $R_n$     | 0.04                | 0.28   | -0.03  | 0.13   | 0.01   |
| $S$       | -0.02               | 0.27   | -0.02  | -0.16  | -0.10  |

Table S3. Values of the principal components.

| Basin No. | $PC_1$ | $PC_2$ | $PC_3$ | $PC_4$ | $PC_5$ |
|-----------|--------|--------|--------|--------|--------|
| 1         | -0.064 | 0.902  | 0.51   | -1.138 | -0.357 |
| 2         | 1.613  | 1.711  | 0.857  | -0.745 | -0.354 |
| 3         | 0.325  | 1.288  | -1.45  | -1.578 | -0.587 |
| 4         | -0.095 | 1.397  | 1.38   | -1.771 | 0.763  |
| 5         | 1.018  | 0.08   | 0.213  | -0.013 | 0.939  |
| 6         | 1.082  | -0.895 | 1.181  | -0.363 | -0.422 |
| 7         | 0.269  | -1.076 | -0.995 | -0.525 | 0.657  |
| 8         | 0.754  | -1.031 | -0.378 | 0.581  | -1.065 |
| 9         | -0.561 | -0.925 | -1.086 | -0.332 | -0.748 |
| 10        | -0.637 | -1.039 | -0.277 | -0.132 | 0.319  |
| 11        | 0.097  | -0.657 | 1.889  | 0.511  | 0.279  |
| 12        | -1.005 | 1.562  | 0.789  | -0.401 | -0.301 |
| 13        | -0.735 | 1.057  | 0.11   | 1.472  | -1.037 |
| 14        | -0.477 | 2.075  | -0.495 | 3.583  | -1.776 |
| 15        | -0.753 | -1.196 | 0.359  | -0.386 | 0.251  |
| 16        | 1.137  | -0.531 | 0.404  | 0.412  | 0.969  |
| 17        | -0.859 | -0.785 | -1.224 | 0.883  | 1.11   |
| 18        | -1.268 | -0.93  | 0.237  | 0.199  | -0.263 |
| 19        | -1.006 | -0.575 | -1.27  | 0.143  | 1.873  |
| 20        | -0.984 | -0.957 | -1.022 | -0.361 | 1.155  |
| 21        | -1.122 | -1.144 | 0.485  | -0.221 | 0.526  |
| 22        | -0.917 | -1.037 | -0.732 | -0.903 | 1.72   |
| 23        | -1.378 | 0.451  | 0.84   | -1.521 | 1.45   |
| 24        | -0.958 | 0.212  | 0.299  | 0.225  | 0.644  |
| 25        | -0.67  | 1.382  | 0.187  | 0.763  | -0.481 |
| 26        | -0.639 | 0.147  | -0.268 | 0.956  | -1.212 |
| 27        | -0.336 | 2.589  | -1.371 | -0.35  | -0.137 |
| 28        | -0.345 | 2.664  | -0.865 | 0.651  | 0.217  |
| 29        | -0.472 | 0.077  | -0.171 | 2.953  | -0.766 |

|    |        |        |        |        |        |
|----|--------|--------|--------|--------|--------|
| 30 | 1.856  | 2.081  | 2.383  | 1.078  | 2.443  |
| 31 | -1.022 | -0.109 | 0.394  | -1.944 | 0.179  |
| 32 | 1.353  | 1.335  | -1.821 | -1.385 | 0.778  |
| 33 | -1.098 | 0.297  | 1.014  | -0.58  | -1.079 |
| 34 | -0.918 | 0.029  | 0.767  | -0.793 | -0.101 |
| 35 | 0.599  | 0.383  | 0.275  | -0.843 | 0.452  |
| 36 | -0.886 | -0.647 | -0.2   | 0.974  | 1.549  |
| 37 | -0.843 | -1.017 | 1.158  | 2.065  | -1.164 |
| 38 | -0.712 | -1.059 | -0.276 | -0.598 | -0.096 |
| 39 | -0.845 | -1.287 | 0.757  | -0.563 | -0.381 |
| 40 | -0.924 | -1.188 | 0.643  | -0.799 | -1.069 |
| 41 | -1.2   | 1.373  | 1.242  | -0.926 | -1.426 |
| 42 | -1.218 | 1.366  | 1.452  | -1.044 | -1.293 |
| 43 | -1.149 | 1.747  | 1.39   | -1.435 | -0.93  |
| 44 | 0.6    | 2.408  | 1.078  | -1.173 | 0.391  |
| 45 | -1.404 | 1.025  | 1.922  | -0.112 | 0.882  |
| 46 | -0.854 | 1.549  | -0.705 | 2.458  | 3.007  |
| 47 | -0.622 | 1.288  | -1.811 | 1.82   | -0.057 |
| 48 | -1.231 | 0      | -0.128 | 0.894  | 2.852  |
| 49 | -0.099 | -1.166 | -0.669 | -0.413 | -0.647 |
| 50 | -1.122 | -0.114 | -0.217 | -0.917 | -0.534 |
| 51 | -0.931 | 1.309  | -0.689 | 1.464  | 2.037  |
| 52 | -0.824 | 1.733  | -0.906 | 1.439  | 0.172  |
| 53 | -1.227 | 0.167  | 0.246  | -0.304 | 0.301  |
| 54 | -0.634 | -0.439 | -1.612 | 1.278  | -0.637 |
| 55 | -1.119 | -0.866 | 0.265  | 1.459  | -1.317 |
| 56 | -1.008 | -1.306 | -1.165 | -0.665 | 2.122  |
| 57 | -1.305 | -0.979 | 0.219  | -1.877 | 0.234  |
| 58 | -0.916 | -0.756 | -0.456 | 1.374  | -0.995 |
| 59 | -0.064 | 0.902  | 0.51   | -1.138 | -0.357 |

|    |        |        |        |        |        |
|----|--------|--------|--------|--------|--------|
| 60 | 1.613  | 1.711  | 0.857  | -0.745 | -0.354 |
| 61 | 0.325  | 1.288  | -1.45  | -1.578 | -0.587 |
| 62 | -0.095 | 1.397  | 1.38   | -1.771 | 0.763  |
| 63 | 1.018  | 0.08   | 0.213  | -0.013 | 0.939  |
| 64 | 1.082  | -0.895 | 1.181  | -0.363 | -0.422 |
| 65 | 0.269  | -1.076 | -0.995 | -0.525 | 0.657  |
| 66 | 0.754  | -1.031 | -0.378 | 0.581  | -1.065 |
| 67 | -0.561 | -0.925 | -1.086 | -0.332 | -0.748 |
| 68 | -0.637 | -1.039 | -0.277 | -0.132 | 0.319  |
| 69 | 0.097  | -0.657 | 1.889  | 0.511  | 0.279  |
| 70 | -1.005 | 1.562  | 0.789  | -0.401 | -0.301 |
| 71 | -0.735 | 1.057  | 0.11   | 1.472  | -1.037 |
| 72 | -0.477 | 2.075  | -0.495 | 3.583  | -1.776 |
| 73 | -0.753 | -1.196 | 0.359  | -0.386 | 0.251  |
| 74 | 1.137  | -0.531 | 0.404  | 0.412  | 0.969  |
| 75 | -0.859 | -0.785 | -1.224 | 0.883  | 1.11   |
| 76 | -1.268 | -0.93  | 0.237  | 0.199  | -0.263 |
| 77 | -1.006 | -0.575 | -1.27  | 0.143  | 1.873  |
| 78 | -0.984 | -0.957 | -1.022 | -0.361 | 1.155  |
| 79 | -1.122 | -1.144 | 0.485  | -0.221 | 0.526  |
| 80 | -0.917 | -1.037 | -0.732 | -0.903 | 1.72   |
| 81 | -1.378 | 0.451  | 0.84   | -1.521 | 1.45   |
| 82 | -0.958 | 0.212  | 0.299  | 0.225  | 0.644  |
| 83 | -0.67  | 1.382  | 0.187  | 0.763  | -0.481 |
| 84 | -0.639 | 0.147  | -0.268 | 0.956  | -1.212 |
| 85 | -0.336 | 2.589  | -1.371 | -0.35  | -0.137 |
| 86 | -0.345 | 2.664  | -0.865 | 0.651  | 0.217  |
| 87 | -0.472 | 0.077  | -0.171 | 2.953  | -0.766 |
| 88 | 1.856  | 2.081  | 2.383  | 1.078  | 2.443  |
| 89 | -1.022 | -0.109 | 0.394  | -1.944 | 0.179  |



|     |        |        |        |        |        |
|-----|--------|--------|--------|--------|--------|
| 90  | 1.353  | 1.335  | -1.821 | -1.385 | 0.778  |
| 91  | -1.098 | 0.297  | 1.014  | -0.58  | -1.079 |
| 92  | -0.918 | 0.029  | 0.767  | -0.793 | -0.101 |
| 93  | 0.599  | 0.383  | 0.275  | -0.843 | 0.452  |
| 94  | -0.886 | -0.647 | -0.2   | 0.974  | 1.549  |
| 95  | -0.843 | -1.017 | 1.158  | 2.065  | -1.164 |
| 96  | -0.712 | -1.059 | -0.276 | -0.598 | -0.096 |
| 97  | -0.845 | -1.287 | 0.757  | -0.563 | -0.381 |
| 98  | -0.924 | -1.188 | 0.643  | -0.799 | -1.069 |
| 99  | -1.2   | 1.373  | 1.242  | -0.926 | -1.426 |
| 100 | -1.218 | 1.366  | 1.452  | -1.044 | -1.293 |
| 101 | -1.149 | 1.747  | 1.39   | -1.435 | -0.93  |
| 102 | 0.6    | 2.408  | 1.078  | -1.173 | 0.391  |
| 103 | -1.404 | 1.025  | 1.922  | -0.112 | 0.882  |
| 104 | -0.854 | 1.549  | -0.705 | 2.458  | 3.007  |
| 105 | -0.622 | 1.288  | -1.811 | 1.82   | -0.057 |
| 106 | -1.231 | 0      | -0.128 | 0.894  | 2.852  |
| 107 | -0.099 | -1.166 | -0.669 | -0.413 | -0.647 |
| 108 | -1.122 | -0.114 | -0.217 | -0.917 | -0.534 |
| 109 | -0.931 | 1.309  | -0.689 | 1.464  | 2.037  |
| 110 | -0.824 | 1.733  | -0.906 | 1.439  | 0.172  |
| 111 | -1.227 | 0.167  | 0.246  | -0.304 | 0.301  |
| 112 | -0.634 | -0.439 | -1.612 | 1.278  | -0.637 |

Table S4. Predicted probability for flash flooding.

| Basin No. | $p$   | Logit( $p$ ) |
|-----------|-------|--------------|
| 1         | 0.409 | -0.37        |
| 2         | 0.046 | -3.02        |
| 3         | 0.422 | -0.31        |
| 4         | 0.092 | -2.29        |
| 5         | 0.036 | -3.29        |
| 6         | 0.014 | -4.29        |
| 7         | 0.026 | -3.61        |
| 8         | 0.000 | -8.74        |
| 9         | 0.030 | -3.47        |
| 10        | 0.050 | -2.95        |
| 11        | 0.008 | -4.80        |
| 12        | 0.019 | -3.92        |
| 13        | 0.000 | -8.44        |
| 14        | 0.001 | -6.66        |
| 15        | 0.000 | -9.01        |
| 16        | 0.001 | -6.58        |
| 17        | 0.004 | -5.50        |
| 18        | 0.001 | -7.11        |
| 19        | 0.013 | -4.36        |
| 20        | 0.010 | -4.61        |
| 21        | 0.004 | -5.61        |
| 22        | 0.006 | -5.11        |
| 23        | 0.008 | -4.84        |
| 24        | 0.021 | -3.83        |
| 25        | 0.016 | -4.14        |
| 26        | 0.016 | -4.11        |
| 27        | 0.094 | -2.27        |
| 28        | 0.031 | -3.46        |
| 29        | 0.005 | -5.27        |

|    |       |       |
|----|-------|-------|
| 30 | 0.236 | -1.17 |
| 31 | 0.028 | -3.55 |
| 32 | 0.001 | -6.57 |
| 33 | 0.003 | -5.74 |
| 34 | 0.055 | -2.85 |
| 35 | 0.008 | -4.88 |
| 36 | 0.022 | -3.77 |
| 37 | 0.122 | -1.97 |
| 38 | 0.001 | -6.66 |
| 39 | 0.036 | -3.29 |
| 40 | 0.001 | -6.90 |
| 41 | 0.002 | -6.16 |
| 42 | 0.061 | -2.73 |
| 43 | 0.001 | -6.68 |
| 44 | 0.020 | -3.92 |
| 45 | 0.044 | -3.08 |
| 46 | 0.054 | -2.87 |
| 47 | 0.187 | -1.47 |
| 48 | 0.212 | -1.31 |
| 49 | 0.003 | -5.75 |
| 50 | 0.077 | -2.49 |
| 51 | 0.000 | -7.63 |
| 52 | 0.044 | -3.08 |
| 53 | 0.109 | -2.10 |
| 54 | 0.759 | 1.15  |
| 55 | 0.157 | -1.68 |
| 56 | 0.761 | 1.16  |
| 57 | 0.191 | -1.44 |
| 58 | 0.835 | 1.62  |
| 59 | 0.114 | -2.05 |

|    |       |        |
|----|-------|--------|
| 60 | 0.062 | -2.71  |
| 61 | 0.012 | -4.40  |
| 62 | 0.001 | -6.92  |
| 63 | 0.001 | -7.27  |
| 64 | 0.002 | -6.35  |
| 65 | 0.010 | -4.62  |
| 66 | 0.023 | -3.74  |
| 67 | 0.000 | -8.67  |
| 68 | 0.000 | -12.60 |
| 69 | 0.003 | -5.78  |
| 70 | 0.042 | -3.12  |
| 71 | 0.000 | -8.44  |
| 72 | 0.000 | -8.05  |
| 73 | 0.002 | -6.34  |
| 74 | 0.002 | -6.14  |
| 75 | 0.002 | -6.30  |
| 76 | 0.013 | -4.31  |
| 77 | 0.179 | -1.53  |
| 78 | 0.003 | -5.68  |
| 79 | 0.002 | -6.30  |
| 80 | 0.000 | -8.78  |
| 81 | 0.038 | -3.22  |
| 82 | 0.011 | -4.48  |
| 83 | 0.000 | -12.08 |
| 84 | 0.866 | 1.87   |
| 85 | 0.107 | -2.12  |
| 86 | 0.687 | 0.79   |
| 87 | 0.005 | -5.26  |
| 88 | 0.016 | -4.11  |
| 89 | 0.238 | -1.16  |

|     |       |        |
|-----|-------|--------|
| 90  | 0.001 | -7.41  |
| 91  | 0.000 | -11.34 |
| 92  | 0.003 | -5.93  |
| 93  | 0.003 | -5.95  |
| 94  | 0.002 | -6.21  |
| 95  | 0.020 | -3.87  |
| 96  | 0.032 | -3.40  |
| 97  | 0.133 | -1.87  |
| 98  | 0.872 | 1.92   |
| 99  | 0.027 | -3.57  |
| 100 | 0.001 | -7.29  |
| 101 | 0.000 | -9.45  |
| 102 | 0.003 | -5.95  |
| 103 | 0.002 | -6.23  |
| 104 | 0.004 | -5.40  |
| 105 | 0.001 | -6.52  |
| 106 | 0.000 | -7.74  |
| 107 | 0.004 | -5.44  |
| 108 | 0.000 | -10.40 |
| 109 | 0.000 | -11.19 |
| 110 | 0.006 | -5.13  |
| 111 | 0.027 | -3.59  |
| 112 | 0.000 | -10.83 |

---
